# Characterization and Expression Patterns of microRNAs Involved in Rice Grain Filling

Ting Peng<sup>1</sup>, Hongzheng Sun<sup>1</sup>, Yanxiu Du, Jing Zhang, Junzhou Li, Yanxia Liu, Yafan Zhao, Quanzhi Zhao\*

Research Center for Rice Engineering of Henan Agricultural University and Key Laboratory of Physiology, Ecology and Genetic Improvement of Food Crops in Henan Province, Zhengzhou, China

## Abstract

MicroRNAs (miRNAs) are upstream gene regulators of plant development and hormone homeostasis through their directed cleavage or translational repression of the target mRNAs, which may play crucial roles in rice grain filling and determining the final grain weight and yield. In this study, high-throughput sequencing was performed to survey the dynamic expressions of miRNAs and their corresponding target genes at five distinct developmental stages of grain filling. In total, 445 known miRNAs and 45 novel miRNAs were detected with most of them expressed in a developmental stage dependent manner, and the majority of known miRNAs, which increased gradually with rice grain filling, showed negatively related to the grain filling rate. Detailed expressional comparisons revealed a clear negative correlation between most miRNAs and their target genes. It was found that specific miRNA cohorts are expressed in a developmental stage dependent manner during grain filling and the known functions of these miRNAs are involved in plant hormone homeostasis and starch accumulation, indicating that the expression dynamics of these miRNAs might play key roles in regulating rice grain filling.

**Citation:** Peng T, Sun H, Du Y, Zhang J, Li J, et al. (2013) Characterization and Expression Patterns of microRNAs Involved in Rice Grain Filling. PLoS ONE 8(1): e54148. doi:10.1371/journal.pone.0054148

**Editor:** Baohong Zhang, East Carolina University, United States of America

**Received:** June 21, 2012; **Accepted:** December 6, 2012; **Published:** January 24, 2013

**Copyright:** © 2013 Peng et al. This is an open-access article distributed under the terms of the Creative Commons Attribution License, which permits unrestricted use, distribution, and reproduction in any medium, provided the original author and source are credited.

**Funding:** This work was supported by the National Natural Science Foundation of China (30471018, 31271651, 31200973), Program for New Century Excellent Talents in University (NCET-08-0663), Innovation Scientists and Technicians Troop Construction Projects of Henan Province (94200510003), and Program for Innovative Research Team (in Science and Technology) in University of Henan Province (2010IRTSTHN005). The funders had no role in study design, data collection and analysis, decision to publish, or preparation of the manuscript.

**Competing Interests:** The authors have declared that no competing interests exist.

\* E-mail: qzhaoh@126.com

These authors contributed equally to this work.

## Introduction

As one of the most important cereal crops worldwide, rice (*Oryza sativa*) provides over 21% of the calorific needs of the world's population and up to 76% of the calorific intake of the population of South East Asia [1]. The yield of rice needs to be increased rapidly to meet the expanding food demands of the rapidly growing world population and economic development. As we all know, four components contribute to potential rice grain yield, that is, grain weight, grain number per panicle, panicle number per plant, and the ratio of filled grains [2]. It has been documented that grain weight is largely determined by the grain filling [3]. Therefore, research on the grain filling in rice is helpful to enhance the grain weight, hence increasing the grain yield per plant.

Rice grain filling is a process of starch accumulation, because starch contributes 80–90% of the final dry weight of brown rice [4]. The process of grain filling is a complex series of events, including relocation of carbohydrates synthesized by photosynthetic organs and biosynthesis of starch from sucrose in the developing endosperm. It has been reported that several genes, such as GIF1 [3], GS5 [5] and starch synthesis related genes [4] play crucial roles on rice grain filling. The activity of key enzymes, such as, sucrose synthase (SUS), adenosine diphosphate-glucose pyrophosphorylase (AGPase), starch synthase (SS), and starch branching enzyme (SBE) were positively correlated with rice grain filling rate [6]. Higher level of plant hormones such as ABA,

cytokinins, IAA, and brassinosteroids, were significantly and closely related to a higher grain filling rate and starch accumulation [7–10], whereas a higher ethylene level in developing seeds correlates negatively with starch metabolism related enzyme activities and always leads to poor grain filling [7]. However, roles of upstream regulators of these coding genes, such as miRNAs, have not yet been fully studied.

MiRNAs are a class of 20 to 24 nucleotide endogenous small RNAs which can regulate gene expression by cleavage or translational repression of the target gene transcripts [11]. They are proved to play important roles in regulating plant development [12–14], hormone homeostasis [15,16], and stress responses [17,18]. With the development of sequencing technology, deep sequencing has been widely used to identify species or tissue specific miRNAs [19] and to compare the expression of miRNAs between different development stages, treatments or genotypes [20–24]. In recent years, miRNAs in rice seed development were identified and studied in several reports [20,24,25]. In rice grains, most miRNAs were expressed higher in 6 to 10 days after fertilization compared with the earlier stage (1 to 5 days after fertilization) [20]. Most recently study showed that approximately half of the detected miRNAs were up-regulated, whereas the remainder were down-regulated with the development of rice grains in Indica rice filling phase (6–20 DAF) [24]. A rice miRNA, (miR167), may play a role in rice grain development through an

auxin-miR167-ARF8-OsGH3.2 pathway, while other miRNAs such as miR397, miR398, miR408, and miR528 may have important adjusting effects on rice grain development through investigating the expression of miRNAs in the mixture of immature seeds at 3, 6, 9 and 12 days after anthesis [25]. However, all of these studies focused on the prometaphase of rice grain filling. In rice seeds, starch begins to accumulate from 4 days after flowering (DAF) [26], and gets maturation around 35DAF. To the best of our knowledge, the expression patterns of miRNAs and their regulate roles in the whole rice grain filling stage have not been fully studied.

In order to investigate the dynamic expression profile of miRNAs during rice grain filling in japonica rice, the small RNA populations were investigated at 10DAF, 15DAF, 21DAF, 27DAF and 35DAF by high-throughput sequencing technology. In parallel, digital gene expression profiling (DGE) was carried out to compare the expression patterns between miRNAs and their corresponding target genes. As a result, 445 known miRNAs, and 45 novel miRNAs were detected. Furthermore, the potential roles of miRNAs during grain filling were discussed, combined with DGE results, the result indicated that the predicted targets of those miRNAs are involved in many metabolic processes, such as hormone homeostasis and starch accumulations.

## Materials and Methods

### Plant materials, and cultivation

*Oryza sativa* spp. japonica cv. Xinfeng 2 were planted from the same seed lot and grown at a research farm of Henan Agricultural University, Henan Province, China (34°53'N, 113°35'E, 94 m altitude) under non-stress conditions during the rice-growing season. The superior spikelets (n = 35), located at the top of the panicle as experimental materials as Xu et al [26], sampled at 5 d intervals from fertilization to 45 DAF as the method used by Ishimaru et al [27], were used to measure dry grain weight at each sampling time. The grains were separated from the panicle, fast dried at 105°C for 30 min, and then kept at 80°C for a complete dryness until reaching a constant weight. The processes of grain filling were fitted by Logistic growth equation:

$$Y = K / (1 + ae^{-bt}) \quad (1)$$

The grain filling rate (V) was calculated as the derivative of Equation 1:

$$V = Kabe^{-bt} / (1 + ae^{-bt})^2 \quad (2)$$

where Y is the mean weight per grain (mg), t is number of days after flowering (DAF), K, a and b are coefficients determined by regression.

### RNA isolation, library construction, Solexa sequencing and analysis of the deep sequencing data

Total RNA were isolated from dehusked seeds at 10DAF, 15DAF, 21DAF, 27DAF, and 35DAF using TRIzol reagent (Invitrogen, Carlsbad, CA, USA) according to the manufacturer's instructions, then RNase-free DNase I was used to remove the residual DNA for 30 min at 37°C separately. The small RNAs sized at 18–30 nt were gel purified on a 15% polyacrylamide denaturing gel from the total RNA of the five samples. Then the isolated small RNAs were ligated to RNA–DNA chimeric oligo nucleotide adaptors, reverse transcribed, and amplified with 15

cycles of PCR to produce sequencing libraries. The final PCR product was purified and sequenced by using Solexa sequencing technology at Beijing Genomics Institute (Shenzhen, China) according to the manufacturer's protocols, respectively.

After removing the adapter sequences and low quality sequences of the deep-sequencing raw data, the resulting unique small RNAs from the five libraries were aligned to the rice genome using SOAP [28]. Whole matching sequences were classified into tRNA, rRNA, small nucleolar RNA (snoRNA), and small nuclear RNA (snRNA) gene derived small RNAs by comparison with the NCBI nucleotide database and Rfam RNA family database [29]. Small RNAs mapped to these non-coding RNAs were removed from the dataset. Then the remainder small RNAs were aligned to miRNA precursor sequences of rice miRNA database available in miRBase (miRBase release 17) to obtain the known miRNAs. And the sequences located at the position  $\pm 2$  nt of the precursors were also included as mature miRNAs. Small RNAs positioned at repeat loci and aligned to exon and intron of mRNA were also identified and annotated. To ensure every unique small RNAs mapped to only one annotation, we follow the following priority rule: rRNAetc (in which Genbank > Rfam) > known miRNA > repeat > exon > intron. Finally, to compare the expression patterns of these miRNAs during grain filling, the abundance of each miRNAs in the five libraries were normalized to transcripts per million (TPM) as we previously described [30].

### Identification of novel miRNAs

After mapping the clean reads to NCBI nucleotide database, Rfam RNA family database, and miRBase, the unannotated small RNAs were subjected to 'MIREAP' (<https://sourceforge.net/projects/mireap/>) to identify the novel miRNA candidates under the following parameters: minimal candidate sequence length (18), maximal candidate sequence length (25), maximal free energy allowed for a candidate miRNA precursor (–18 kcal/mol), maximal space between candidate miRNA and miRNA\* (300), minimal base pairs of candidate miRNA and miRNA\* (16), maximal bulge of candidate miRNA and miRNA\* (4), maximal asymmetry of candidate miRNA/miRNA\* duplex (4), flank sequence length of candidate miRNA precursor (20). Furthermore, only the candidate satisfied the following criteria was considered as a novel miRNA: the candidate has the presence of their corresponding miRNA\* sequences, a strong indication of the products from DCL1 processing during miRNA biogenesis in at least one of the libraries or the mature sequence could be identified from more than half of our libraries.

### Target gene prediction for miRNAs and KEGG pathway analysis

To determine the potential targets of known and novel miRNAs expressed in rice grain filling, *Oryza Sativa* MSU Rice Genome Annotation release 6.1 was used. The rules used for target prediction were based on those suggested by Allen et al [31] and Schwab et al [32]: 1) No more than four mismatches between miRNA and potential target (G-U bases count as 0.5 mismatches); 2) No more than two adjacent mismatches in the miRNA/target duplex; 3) No adjacent mismatches in positions 2–12 of the miRNA/target duplex (5' of miRNA); 4) No mismatches in positions 10–11 of miRNA/target duplex; 5) No more than 2.5 mismatches in positions 1–12 of the miRNA/target duplex (5' of miRNA); 6) Minimum free energy (MFE) of the miRNA/target duplex should be  $\geq 75\%$  of the MFE of the miRNA bound to its perfect match location. Then, online genomic analysis tools of the KEGG pathway database (<http://www.genome.jp/kegg/>) were used for pathway enrichment analysis.

## DGE library construction, sequencing and digital tag profiling

Sequence tag preparation was performed with the Illumina Digital Gene Expression Tag Profiling Kit (Illumina, Inc.) according to the manufacturer's protocol. In brief, total RNA (6  $\mu$ g) isolated from rice grains at 10DAF, 15DAF, 21DAF, 27DAF, and 35DAF were used to purify mRNA by OligodT magnetic beads adsorption, respectively, then the first and second-strand cDNA were synthesized, and the 5' ends of tags were generated by endonuclease Nla III, which recognizes and cuts off the CATG sites. The fragments apart from the 3' cDNA fragments attached to OligodT beads were washed away. The Illumina adaptor 1 was ligated to the sticky 5' end of the digested bead-bound cDNA fragments, which containing a recognition site for the endonuclease Mme I which had the ability to cut 17 bp downstream from the recognition site (CATG). After removing 3' fragments with magnetic beads precipitation, Illumina adaptor 2 was ligated to the 3' ends of tags, acquiring tags with different adaptors of both ends to form a tag library. After 15 cycles of linear PCR amplification, 105 bp fragments were purified by 6% (w/v) TBE PAGE Gel electrophoresis. Followed by denaturation, the single-chain molecules were fixed onto the Illumina Sequencing Chip (flowcell). Each molecule grows into a single-molecule cluster sequencing template through situ amplification. Then four types of nucleotides, which are labeled by four colors, were added and sequencing with the method of sequencing by synthesis was performed.

After sequencing, the raw sequences were transformed into 17 bp clean tags, and tag counting was carried out using the Illumina Pipeline. First, 3' adaptor sequence and low quality tags, including short tags (<21 nt), long tags (>21 nt), empty reads, and the tags which were sequenced only once were removed. Then the remaining clean tags were mapped to the rice genome by SOAP [28]. The gene expression levels were represented by a summation of all tags while multiple tag types aligned to different positions of the same gene. Then the gene expression data were normalized to transcripts per million (TPM) clean tags.

## Quantitative real-time RT-PCR (Q-PCR)

Q-PCR experiments were performed as we used previously [30]. In brief, total RNA (1  $\mu$ g) was reverse-transcribed using a reverse transcriptase enzyme (Promega) and the test miRNA-specific stem-loop reverse transcription primer. In the Q-PCR, a 5  $\mu$ l aliquot of 1:20 diluted cDNA was used as the template in a 20  $\mu$ l PCR reaction system. They were carried out using SYBR green reaction mix (SYBR<sup>®</sup> Green QRT-PCR Master Mix; Toyobo) after a pre-incubation at 95°C for 5 min, followed by 40 cycles of denaturation at 95°C for 15 s, annealing at 60°C for 15 s, and extension at 72°C for 32 s, in a BioRad iQ5 sequence detection system (BioRad, USA). The actin gene was used as the house-keeping gene. The relative fold expression changes of target genes were calculated using the 2<sup>delta-delta Ct</sup> method. All gene specific primers used in the experiments are listed in **Table S1**.

## RNA ligase-mediated 5' RACE

To map the cleavage sites of target transcripts, we used RNA ligation-mediated (RLM) rapid amplification of 5' complementary DNA ends (5' RACE) using a GeneRacer kit (Invitrogen, Carlsbad, CA, USA). In brief, total RNAs (4  $\mu$ g) from equal mixtures of rice grains (10DAF, 15DAF, 21DAF, 27DAF, and 35DAF) were ligated to a 5' RACE RNA adapter without calf intestine alkaline phosphatase treatment. cDNAs were transcribed with reverse transcriptase by the GeneRacer OligodT primer.

GeneRacer<sup>TM</sup> 5' Primer (5'-CGACTGGAGCAGGAGGACACTGA-3'), GeneRacer<sup>TM</sup> 5' Nested Primer (5'-GGACACTGACATGGACTGAAGGAGTA-3') and two gene-specific reverse primers were used for each RACE (**Table S1**). In each case, a unique gene-specific DNA fragment was amplified. These products were gel purified, cloned (pGEM-T Easy, Promega), and 7 independent clones from each reaction were sequenced finally.

## Results

### Global analysis of small RNAs in rice grain filling

To investigate the dynamic variation of miRNAs during rice grain filling, Solexa high-throughput sequencing technology was employed to sequence the small RNAs from the immature grains at 10DAF, 15DAF, 21DAF, 27DAF, 35DAF. After removing the low quality sequences and adapter sequences, a total of 10,658,388 to 14,248,902 reads, representing 3,518,252 to 4,770,477 unique sequences were obtained in each library (**Table 1**). Furthermore, more than 79.68% of the unique small RNAs, standing for over 82.46% of the small RNAs mapped perfectly to the genome (**Table 1**). To find the known miRNAs and their expression at different periods of rice grain filling, the clean reads of each datasets were mapped to the precursor sequences of rice miRNA database available in miRBase (release 17). Finally, we obtained 1,073,728 to 1,146,855 tags, representing 5,701 to 5,941 unique reads mapped perfectly to the miRNA precursor in the five grain-filling stages. In addition, small RNAs from Solexa deep sequencing also contained other kinds of RNAs, including rRNA, tRNA, snRNA and snoRNA with different abundances (**Table 1**).

In plants, the majority of small RNAs are 21 to 24 nt in length, most miRNAs are 20 to 22 nt; siRNAs are mostly 21 and 24 nt [33], whereas 23 nt small RNAs may present as a new class of functional small RNAs [23]. In this study, the numbers of unique and total small RNA sequences ranging from 18 to 30 nt in length was examined. When the unique small RNA sequences were counted, 24 nt small RNAs were dominant in all libraries (**Fig. 1A**). In terms of total small RNA sequences from the five libraries made from different stages during rice grain filling, there are two peaks at 24 and 21 nt, and more than half of them were 24 nt, accounting for 50.85%, while 21 nt small RNAs shared 22.07%. Moreover, the percentage of 24 nt small RNAs gradually decreased with rice grain filling, while 21 nt small RNAs showed a reverse trend (**Fig. 1B**).

### Newly identified miRNAs involve in rice grain filling

In general, the presence of miRNA\*s are indicative of *bona fide* miRNA genes in plants [34]. Therefore, novel miRNAs identified from the miRNA candidates produced from MIREAP were first considered based on the presence of miRNA\*s in at least one of our libraries, and 22 novel miRNAs were identified by this standard. On the other hand, 23 novel miRNAs were founded based on a different method proposed by Wei et al [35] as we described in materials and methods. In total, 45 novel miRNAs were identified in this study (**Table 2, Fig. S1**). Among the novel miRNAs, some of them were expressed only in specific periods of grain filling. For instance, miRn1-n17 were highly accumulated in one or two phases, but not expressed in other stages during rice grain filling. In addition, miRn45-5p abundantly detected in all the five libraries may have physiological effects on rice grain filling (**Table 2**).

**Table 1.** Summary of small RNA classes during rice grain filling.

| Category                | 10DAF     |            | 15DAF     |            | 21DAF     |            | 27DAF     |            | 35DAF     |            |
|-------------------------|-----------|------------|-----------|------------|-----------|------------|-----------|------------|-----------|------------|
|                         | Unique    | Total      | Unique    | Total      | Unique    | Total      | Unique    | Total      | Unique    | Total      |
| <b>Total</b>            | 4,478,689 | 14,248,902 | 4,770,477 | 13,297,350 | 3,930,540 | 11,378,685 | 3,884,446 | 11,647,614 | 3,518,252 | 10,658,388 |
| <b>exon_antisense</b>   | 133,165   | 746,308    | 133,212   | 804,510    | 118,578   | 739,153    | 123,673   | 894,862    | 114,010   | 871,834    |
| <b>exon_sense</b>       | 219,967   | 757,184    | 228,286   | 616,801    | 220,097   | 503,337    | 218,837   | 499,487    | 190,991   | 453,826    |
| <b>intron_antisense</b> | 130,900   | 452,915    | 140,388   | 346,714    | 115,639   | 218,944    | 116,330   | 198,276    | 102,339   | 174,627    |
| <b>intron_sense</b>     | 138,967   | 500,657    | 151,203   | 435,494    | 124,176   | 294,757    | 127,163   | 282,784    | 112,208   | 261,087    |
| <b>miRNA</b>            | 5,693     | 1,073,707  | 5,932     | 1,146,820  | 4,768     | 1,114,668  | 4,985     | 1,141,378  | 4,930     | 1,145,735  |
| <b>rRNA</b>             | 78,926    | 1,143,956  | 74,912    | 1,104,228  | 88,092    | 1,653,911  | 95,275    | 1,798,049  | 88,828    | 1,416,786  |
| <b>repeat</b>           | 1,335,756 | 3,100,009  | 1,506,174 | 3,275,580  | 1,247,244 | 2,539,845  | 1,258,742 | 2,432,808  | 1,138,203 | 2,248,862  |
| <b>snRNA</b>            | 1,623     | 3,734      | 1,246     | 2,260      | 1,258     | 2,695      | 1,319     | 2,734      | 1,191     | 2,368      |
| <b>snoRNA</b>           | 2,729     | 5,431      | 2,320     | 4,368      | 1,926     | 3,423      | 2,045     | 3,535      | 1,798     | 3,127      |
| <b>tRNA</b>             | 8,815     | 270,468    | 10,435    | 391,405    | 10,829    | 573,145    | 12,300    | 664,809    | 12,391    | 474,220    |
| <b>No_annotation</b>    | 2,422,148 | 6,194,533  | 2,516,369 | 5,169,170  | 1,997,933 | 3,734,807  | 1,923,777 | 3,728,892  | 1,751,363 | 3,605,916  |

doi:10.1371/journal.pone.0054148.t001

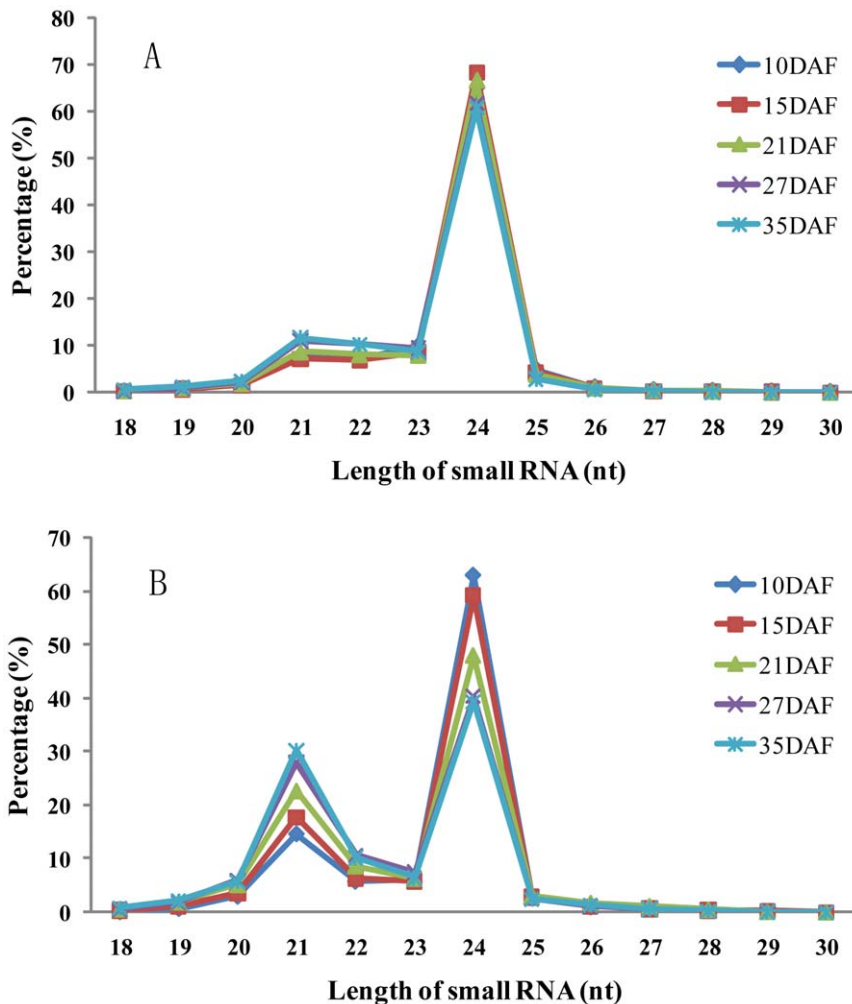

**Figure 1.** Size distributions of the unique (A) and total (B) small RNA sequences during rice grain filling.

doi:10.1371/journal.pone.0054148.g001

**Table 2.** Sequences and abundance of novel identified miRNAs during rice grain filling.

| miRNA ID  | Sequence                | Length | Abundance (TPM) |        |        |        |        | Evidence <sup>#</sup> |
|-----------|-------------------------|--------|-----------------|--------|--------|--------|--------|-----------------------|
|           |                         |        | 10DAF           | 15DAF  | 21DAF  | 27DAF  | 35DAF  |                       |
| miRn1-5p  | CGGCGATGTGGGGGAGGCGCG   | 21     | 5.47            | 0      | 0      | 0      | 0      | *                     |
| miRn2-5p  | AACACACCGGATTGAATCTTTT  | 23     | 0.49            | 0      | 0      | 0      | 0      | *                     |
| miRn3-5p  | TCGACCACGTCGAAGAGGCTCA  | 22     | 0               | 0.45   | 0      | 0      | 0      | *                     |
| miRn4-5p  | TCAACTTCGTTTCGTGAGGCA   | 21     | 0               | 0      | 0.79   | 0      | 0      | *                     |
| miRn5-5p  | CGGTGACAGAAGAGAGTGAGCAC | 23     | 0               | 0      | 0      | 0.43   | 0.47   | *                     |
| miRn6-5p  | TTAGTCTACGTTTCATCTCTC   | 21     | 0               | 0      | 0      | 1.2    | 0      | *                     |
| miRn7-3p  | TCTGCTAATGGTGGTCAGGAC   | 21     | 0               | 0      | 0      | 1.03   | 1.59   | *                     |
| miRn8-3p  | TAGGATGAGAGTTGCATGGTT   | 21     | 0               | 0      | 4.22   | 0      | 0      | *                     |
| miRn9-5p  | AAGGGGCGCTTACTGAGAGTCT  | 23     | 0               | 0.38   | 0      | 0      | 0      | *                     |
| miRn10-5p | TCTTATTGGGTCGTGCTAGGC   | 22     | 1.4             | 0.83   | 0      | 0      | 0      | *                     |
| miRn11-5p | TGTGTAGCCACATTGTAAGGG   | 21     | 0.35            | 0      | 0      | 0      | 1.13   | *                     |
| miRn12-5p | TGGCCTGTAGTTAGTAGAGGG   | 21     | 0               | 0      | 0.53   | 0      | 0      | *                     |
| miRn13-3p | TCAGCACGGATACATTATTTT   | 21     | 0.42            | 0      | 0      | 0      | 0      | *                     |
| miRn14-3p | TGGGAATATCTTTATCTGTT    | 21     | 0               | 0.83   | 0      | 0      | 0      | *                     |
| miRn15-5p | TAAATGGAGAGAACGAAAGAG   | 21     | 0               | 0      | 4.39   | 0      | 0      | *                     |
| miRn16-3p | TCGGACTCTGGCGGCGCTCG    | 21     | 0               | 0      | 0      | 0      | 0.84   | *                     |
| miRn17-5p | TCTTTCACATGGTATTAGAGCTG | 23     | 0               | 0.98   | 1.05   | 0      | 0      | *                     |
| miRn18-3p | TAGATATATATCTAGGATTGGAT | 23     | 0.77            | 1.43   | 0      | 0.94   | 1.31   | *, T                  |
| miRn19-3p | TAACAAAGGACAACAGACTGA   | 21     | 1.89            | 0.98   | 0.88   | 0.86   | 1.59   | *, T                  |
| miRn20-3p | CTTTGAGTAGGCTAAACAGAG   | 23     | 7.16            | 12.86  | 12.83  | 7.38   | 9.38   | *, T                  |
| miRn21-5p | CAGGCAGAGCATGAAGAGCAT   | 21     | 0               | 1.13   | 1.05   | 1.29   | 0      | *, T                  |
| miRn22-3p | TACATTTGGAACAGAGGGAC    | 21     | 3.65            | 4.51   | 14.24  | 19.49  | 17.17  | *, T                  |
| miRn23-5p | TGAGGACAAGAGCTGATTCGG   | 21     | 6.46            | 3.84   | 9.84   | 3.18   | 1.03   | T                     |
| miRn24-3p | TTTGAACCTGATATTTGGTGG   | 21     | 1.75            | 1.96   | 1.32   | 1.03   | 1.22   | T                     |
| miRn25-3p | TACGAGAGATGGGAAAAGACAAC | 23     | 1.12            | 2.41   | 1.32   | 1.29   | 0.66   | T                     |
| miRn26-5p | TTTCTGACTCGGGATGACTAG   | 22     | 1.33            | 1.2    | 0      | 0.69   | 0.75   | T                     |
| miRn27-5p | TCGGGATATGTGGTATTGCGGTT | 23     | 0.84            | 0      | 1.05   | 1.29   | 0      | T                     |
| miRn28-5p | CACGGAATGGAAGAGCGAGAC   | 21     | 0.7             | 1.13   | 0      | 0      | 4.03   | T                     |
| miRn29-5p | ACCCCTTTGCCGGCGCGCGC    | 22     | 0.49            | 0.75   | 0      | 0.6    | 0.47   | T                     |
| miRn30-5p | TGAAAAGTTGGAAATTTGGAG   | 21     | 0.77            | 0      | 0.62   | 0.69   | 0.47   | T                     |
| miRn31-5p | TGGTTTGGGTGGTGGTGCA     | 23     | 2.67            | 3.01   | 0.97   | 0      | 0.66   | T                     |
| miRn32-5p | TAGATGGCTGATCTGGTGTGG   | 21     | 1.68            | 0      | 2.72   | 2.66   | 4.03   | T                     |
| miRn33-3p | TGAGATTGGTTTATTTGGGA    | 21     | 1.05            | 1.88   | 1.49   | 1.72   | 0      | T                     |
| miRn34-5p | TTCGTAAGTGAACCGCACGG    | 21     | 0.42            | 0      | 0      | 3.26   | 0.84   | T                     |
| miRn35-3p | TCAGGAGCAGAAGATGAGGGAG  | 22     | 2.39            | 5.11   | 4.57   | 5.41   | 4.5    | T                     |
| miRn36-5p | TCTCACTTTGGACTAGGTATT   | 21     | 4.35            | 8.12   | 10.81  | 11.59  | 11.63  | T                     |
| miRn37-3p | TTGGTAAGGCGAAAATTGGCAT  | 22     | 1.82            | 1.13   | 1.49   | 1.89   | 1.78   | T                     |
| miRn38-3p | TTGGGGAACGCGCCGATCGTC   | 21     | 0.63            | 0      | 3.16   | 1.97   | 2.06   | T                     |
| miRn39-5p | TGCTCCGATATTATGGCATG    | 21     | 4.63            | 5.11   | 2.81   | 3.61   | 6.29   | T                     |
| miRn40-3p | TCTGAGACAGCGTAGACAGTT   | 21     | 1.75            | 1.73   | 1.58   | 0      | 0      | T                     |
| miRn41-3p | TGCGAAGTAGAGATGCCGACT   | 21     | 0               | 1.73   | 1.14   | 0.94   | 0      | T                     |
| miRn42-5p | ATCTCGATGGTGATTGTTGCT   | 21     | 0               | 1.43   | 0      | 0.6    | 0.47   | T                     |
| miRn43-3p | TTTTGGGAGGATGGCAAATAG   | 21     | 0               | 0.83   | 0.79   | 0.77   | 0      | T                     |
| miRn44-3p | TCGATGCAGTCTCGATGTCG    | 21     | 0               | 0.53   | 0      | 0.52   | 1.31   | T                     |
| miRn45-5p | GCTGGAGTAGCTCAGATGGT    | 20     | 93.06           | 175.82 | 363.22 | 317.49 | 596.71 | T                     |

<sup>#</sup>Evidence of identified miRNA, '\*' indicates the detection of the corresponding miRNA. 'T' indicates that the miRNA were founded at least in three of the five libraries. doi:10.1371/journal.pone.0054148.t002

## The finding of miRNA\*s with an abundance higher than their corresponding miRNAs

Under normal conditions, miRNA/miRNA\* duplexes are unwound after being exported out of the nucleus. MiRNA strands are loaded into the RNA-induced silencing complexes (RISCs) and the miRNA\* strands are degraded [12,36]. Therefore, miRNA levels are usually higher than their corresponding miRNA\* levels. However, in our datasets, four miRNA\*s (miR1425\*, miR1433\*, miR1884b\*, and miR408\*) were more abundant than their corresponding miRNAs, with the most abundant miR408\* at more than 50 fold over miR408 at 10DAF (**Fig. 2, Fig. S2**), which is consistent with our previous results [30]. But these four miRNA\*s were not always higher than their corresponding miRNAs. For example, miR1425 is higher than miR1425\* at later grain filling stage of rice grain filling (35DAF, **Fig. 2**). A recently developed degradome sequencing approach has been successfully used for validating the targets of rice miRNAs [37–39]. To analyze the functions of these highly expressed miRNA\*s, starBase [40] was employed to find the targets of these miRNA\*s in previous degradome sequencing data. Excitingly, four targets of miR1425\*, miR1433\*, and miR1884b\* were identified and validated by the presence of a great many degradation products in the degradome sequencing dataset (**Table S2**). These results are consistent with the previously researches [41,42] and indicate that these miRNA\*s may play important physiological roles in rice grain filling.

## Dynamics analysis of known miRNAs during rice grain filling

In total, 445 known miRNAs were found in the five libraries (**Table S3**). Then, the miRNAs whose expression were higher than 10 TPM in one of our datasets were filtered, and a total of 151 known miRNAs remained for further analysis to minimize noise and improve accuracy (**Table S4**). After hierarchical clustering, these miRNAs were classified into ten groups, and a high proportion of known miRNAs were constitutively expressed during rice grain filling (**Fig. 3; Table S5**). The major representative clusters of this category were VII, IV, III and VIII, which contain 51, 28, 23 and 23 miRNAs, respectively. The miRNAs in cluster VII showed gradually enhancing expression during rice grain filling, but they were negatively correlated with the grain filling rate [PCC (Pearson's correlation coefficient)  $\leq -0.554$ , **Fig. 3; Fig. S3; Table S5**]. While miRNAs in cluster IV first slightly decreased and then increased at later grain filling stage (35DAF), they were positively correlated with the grain filling rate (PCC  $\geq 0.532$ , **Fig. 3; Fig. S3; Table S5**). In cluster III, the expression pattern of these miRNAs showed a gradual increase at early grain filling stage (10–15DAF) and slightly decreased thereafter, showing positive correlation with the grain filling rate (**Fig. 3; Fig. S3; Table S5**). In addition, the miRNAs in cluster VIII showed a gradual increase until the middle grain filling stage (25DAF) then decreased, and finally increased, showing negatively correlation with the grain filling rate (**Fig. 3; Fig. S3; Table S5**). To validate the expression profiles determined by using Solexa sequencing, we performed stem-loop real time quantification RT-PCR (six of them were assayed previously [30]). While the expression patterns of almost all of the tested miRNAs were consistent with those detected by Solexa sequencing during rice grain filling, discrepancies were also observed in the expressions of a few other miRNAs. Such discrepancies may be due to variations in sampling time and methods to be used (**Fig. 4**).

## Target prediction and validation of known and novel miRNAs

In target gene prediction, 133 highly expressed known miRNAs ( $>10$  TPM) were predicted to target 2,942 genes (**Table S6**). KEGG analysis showed these target genes participated in many biological pathways, such as starch and sucrose metabolism, fructose and mannose metabolism, brassinosteroid biosynthesis, zeatin biosynthesis and so on, and played crucial roles in rice grain filling (**Table S7**). To validate the potential targets of miRNAs that might play crucial roles in rice grain filling, two predicted target genes, as an example, were selected and assayed by using rapid amplification of 5' cDNA ends (5' RACE). Os06g16330 encoding a BRASSINOSTEROID INSENSITIVE 1-associated receptor kinase 1 precursor (BAK1) was confirmed as the real target of miR819a-k, which is involved in brassinosteroid homeostasis in plants, and seven cleavage events were detected in the miRNA target site (**Fig. 5**). Os01g63810 is the predicted target of miR1861, encoding a starch-binding domain-containing protein. However, the main cleavage site detected was 29 nt upstream of the predicted miR1861 target site, which was probably caused by an unknown small RNA cleavage mechanism (**Fig. 5**). In addition, 422 genes were predicted to be the targets of 31 novel miRNAs (**Table S8**). Furthermore, six targets for five novel miRNAs were validated by degradome data in starBase (**Table S9**) [40]. However, the cleavage products of these targets showed at a very low frequency in the degradome data. This might be due to the fact that these novel miRNAs were expressed in a tissue-specific and/or developmental stage dependent manner, and that the degradome data was from collective samples of different organs or development stages.

## Correlation analysis of expressions between miRNAs and their corresponding targets

In general, the expression of most miRNAs were negatively correlated with their targets [25]. To further study the relationship between miRNAs and their targets, digital gene expression profiling (DGE) was performed to assay the expression of target genes during rice grain filling. In total, 157 out of 270 target genes identified via degradome sequencing in starBase showed a negative correlation with their corresponding miRNAs (**Fig. 6A; Table S10**), which is consistent with negative correlation of most miRNAs with their corresponding targets in rice reported by Xue et al [25], indicating that the majority of miRNAs guided the degradation of their target gene transcripts. However, some miRNAs and their target genes showed differential or a positive correlation in expression patterns during rice grain filling. For instance, miR159a.1,b,f, miR164a,b,f, miR167e,i, miR390, miR815c, miR818d, miR1425, miR1858a,b were positively correlated with their targets (**Fig. 6B; Table S10**), which may be due to a similar feedback regulation between co-expressed MIR164A and CUC2 genes (miR164 target) as reported in Arabidopsis [43]. It is also possible that these miRNAs might function as translational repressors [36], as the case of miR167 reported in Arabidopsis [44].

## Discussion

MiRNA as a new class of regulatory factors has attracted much attention in recent years. Despite 547 miRNAs and one miRNA\* being reported in *Oryza sativa* according to the miRBase (release 17), regulatory roles of miRNAs in rice grain filling is poorly understood. In this work, high-throughput sequencing technology was employed to investigate the known and novel miRNAs and their expression pattern analysis during rice grain filling. In

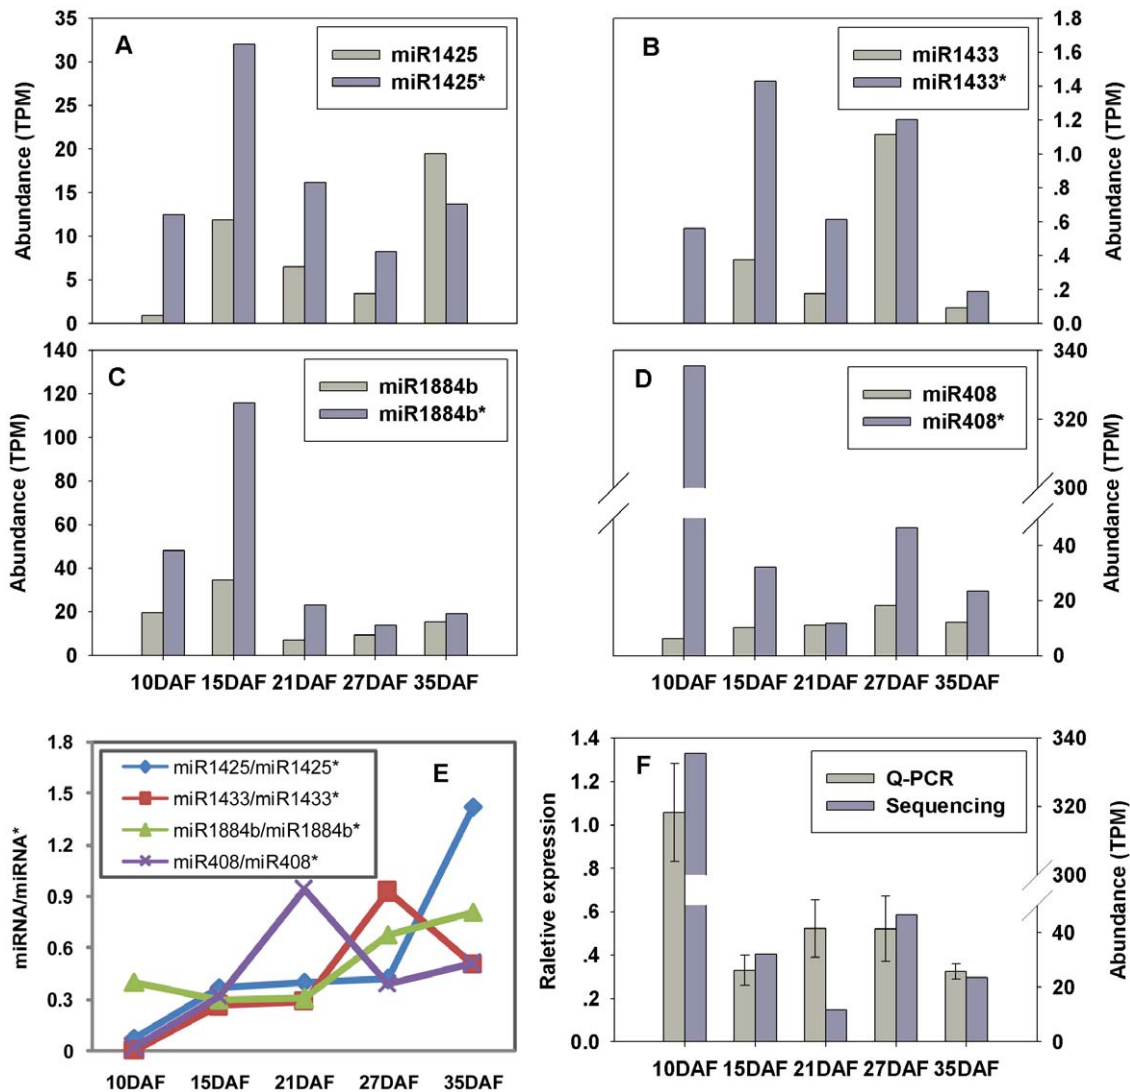

**Figure 2. Expression of several miRNAs and their corresponding miRNA\*s.** A–D: Normalized sequence reads of miR1425, miR1433, miR1884b, miR408, and their corresponding miRNA\*s during rice grain filling. E: The ratio of miRNAs and their corresponding miRNA\*s. F: validation of the abundance of miR408\* by Q-PCR during rice grain filling. DAF represents days after flowering. doi:10.1371/journal.pone.0054148.g002

parallel, the expression patterns of higher expressed miRNA target genes identified through degradome sequencing in starBase were also studied by DGE during rice grain filling, providing the first miRNA dynamics for rice grain filling.

#### Expression patterns of miRNAs during rice grain filling

It is well known that miRNAs are expressed in a developmental stage-dependent and/or tissue-specific manner [12,35,45]. Through deep sequencing, we found that the expression of almost all miRNAs varied with the development of grain filling. But, the majority of these miRNAs increased gradually with the progress of grain filling process (cluster VII). These findings are in agreement with the majority of miRNAs that were expressed higher in 6 to 10 DAF grains than in 1 to 5 DAF grains and about half of the detected miRNAs were up-regulated with the grain filling process of indica rice [20,24]. In addition, 45 novel miRNAs identified in this work displayed expression in a developmental stage dependent manner. Furthermore, the expression of the miRNAs in cluster III and IV were positively correlated with the grain filling rate,

whereas miRNAs in cluster VII and VIII were negatively related to the grain filling rate (Table S5). As a result, we conclude that the expression dynamics of these miRNAs found in the grain filling might play key roles in regulating many metabolic processes involved in the rice grain filling through cleaving or translationally repressing their corresponding target gene transcripts in a grain filling stage-dependent manner.

#### miRNA\* may involve in regulating rice grain filling

It is believed that miRNA\*s were gradually degraded when mature miRNAs guided the silencing of their corresponding target mRNAs with the help of RNA-induced silencing complex (RISC) [36]. Nevertheless, four miRNA\*s (miR1425\*, miR1433\*, miR1884b\*, and miR408\*) were more abundant than their corresponding miRNAs were found (except for miR1425 at 35DAF), and the ratio between miRNA and miRNA\* varied during rice grain filling as well (Fig. 2). In recent years, cleavage and translational repression of miRNA and miRNA\* have been already observed in plants through two distinct argonaute proteins







**Figure 3. Hierarchical clustering and expression patterns of known miRNAs during rice grain filling.** miRNAs that are expressed higher than 10 TPM in one of our datasets were listed, depicted in a heat map representation, and performed on the log<sub>2</sub>-normalized expression. Red represents high expression and green represents low expression. The line charts showed the expression patterns of every cluster in the heat map on the left. DAF represents days after flowering.  
doi:10.1371/journal.pone.0054148.g003

(AGOs): miRNA through AGO1 and miRNA\* through AGO2 [46,47]. One example is miR393b\*, which regulates plant immunity by translational inhibition its targeting gene MEMB12 involved in plant defense responses through AGO2 in Arabidopsis [47]. miR169d\*,l\*,m\*,e.2\*, more abundant than miR169, mediate the cleavage of the arbuscule-specific protein MtBcp1, and miR5024\* targets a GRAS transcription factor specifically expressed in mycorrhizal roots of *Medicago truncatula* [41]. In addition to the previous reported miRNA\*s, four target genes regulated by miR1425\*, miR1433\* and miR1884b\* were validated by previous degradome sequencing (Table S2). For example, miR1433\* targets two nuclear transcription factor Y subunits shown to control a variety of important agronomical traits, including seed development, flowering time, and drought tolerance [48]. Moreover, miRNA\*-mediated self-regulation of their host precursors has been discovered in Arabidopsis and rice, such as ath-MIR161 and osa-MIR445d [49]. Furthermore, miRNA/miRNA\* ratios different during rice grain filling was founded,

which also exists in mammals [50], where miR-223 and miR-223\* targeted the same mRNA and higher miR-223\* levels were associated with increased overall survival in patients with acute myeloid leukemia [51]. Hence, higher levels of miRNA\* may be involved in rice grain filling through directing cleavage or translational repression of their target mRNAs, self-regulation of their host precursors, or functioning dependent on the ratio between the mature and star strands.

**MiRNA regulates plant hormone homeostasis during rice grain filling**

Several plant hormones, including auxin, abscisic acid, cytokinin, gibberellin, ethylene, brassinosteroids, and jasmonate, take part in many biological processes throughout plant growth and development [52]. And without exception, these hormones play key roles in regulating rice grain filling [7–9,53]. Accumulating evidence indicates that miRNAs play vital roles in plant

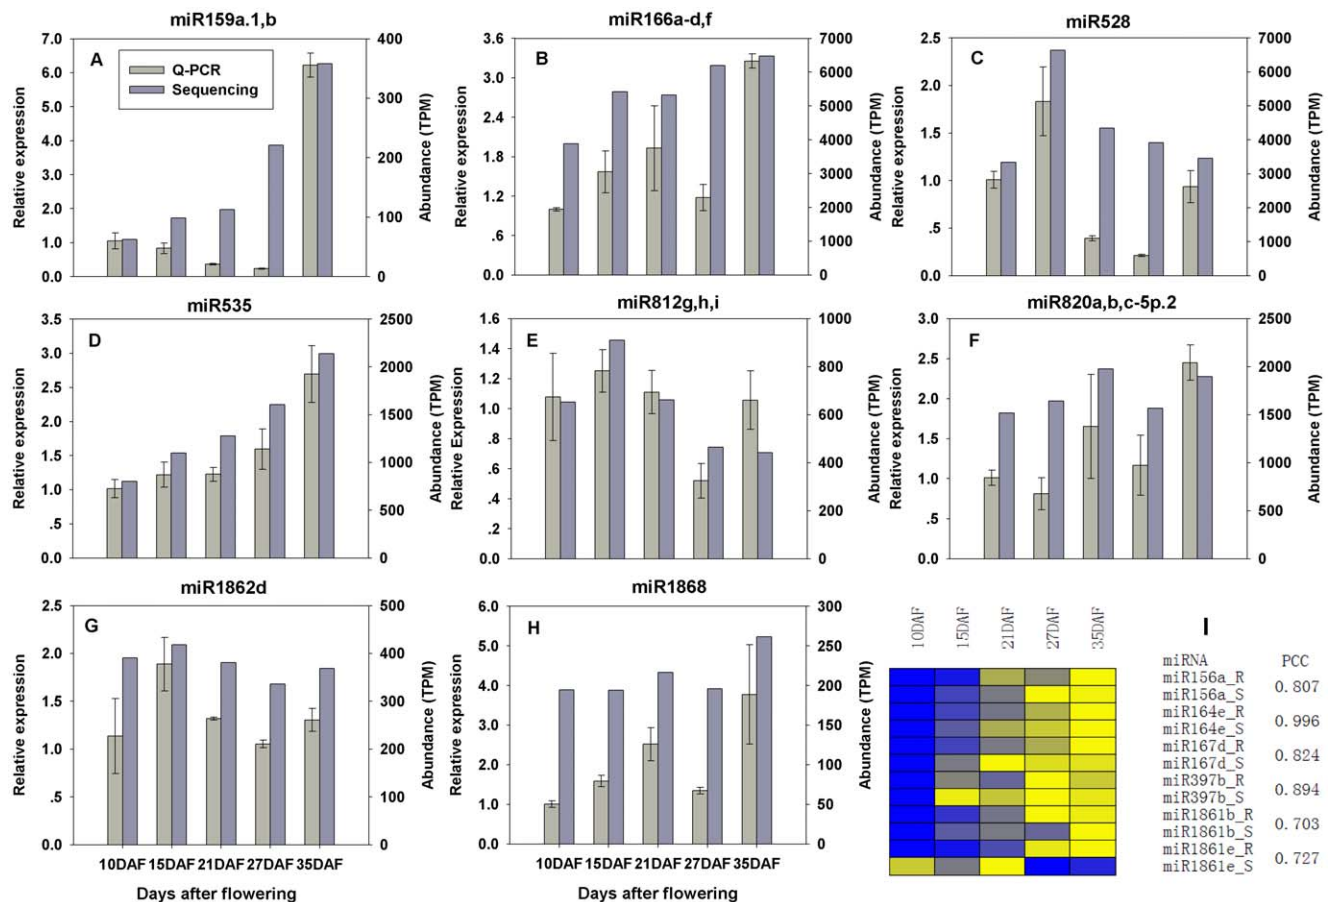

**Figure 4. Expression profiling analysis and validation of the abundance of miRNAs by Q-PCR during rice grain filling.** A–H: The expression levels of each miRNA were normalized by comparison with the expression of miRNA in immature grains at 10DAF, which was set as 1.0. The experiments were repeated with three biological replicates and error bars represent the standard error. I: Correlation of the abundance between Q-PCR (we assayed previously [30]) and Solexa sequencing was presented by Pearson's correlation coefficient (PCC). Yellow represents high expression and blue represents low expression. R denotes expression detected by Q-PCR and S represents expression detected by Solexa sequencing. DAF represents days after flowering.  
doi:10.1371/journal.pone.0054148.g004

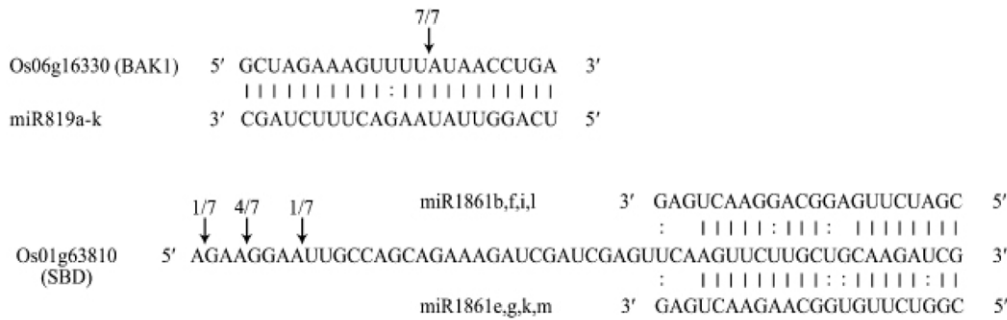

**Figure 5. 5'-RACE verification of predicted miRNA targets.** Watson-Crick pairing (vertical dashes) and G:U wobble pairing (colons) are indicated. Arrows indicate the 5' termini of mRNA fragments isolated from the mixture of immature rice grains, and the frequency of clones was shown on the top of the arrow. BAK1: BRASSINOSTEROID INSENSITIVE 1-associated receptor kinase 1 precursor; SBD: starch-binding domain containing protein.  
 doi:10.1371/journal.pone.0054148.g005

phytohormone homeostasis [15,16,54–56], suggesting a miRNA-phytohormone interaction might have roles in rice grain filling post pollination/fertilization. For example, OsGH3-2 is a rice IAA-conjugating enzyme, and miR167 down regulated the expression of OsGH3-2 by cleavage of ARF8 mRNA in the

presence of auxin. This indicates that the auxin-miR167-ARF8-OsGH3-2 pathway is indispensable in regulating the appropriate cellular free auxin level in plants [56]. In our dataset, miR167 was strongly expressed in the developing stage of rice grains, as well as gradually increased during rice grain filling periods (**Fig. 7A**).

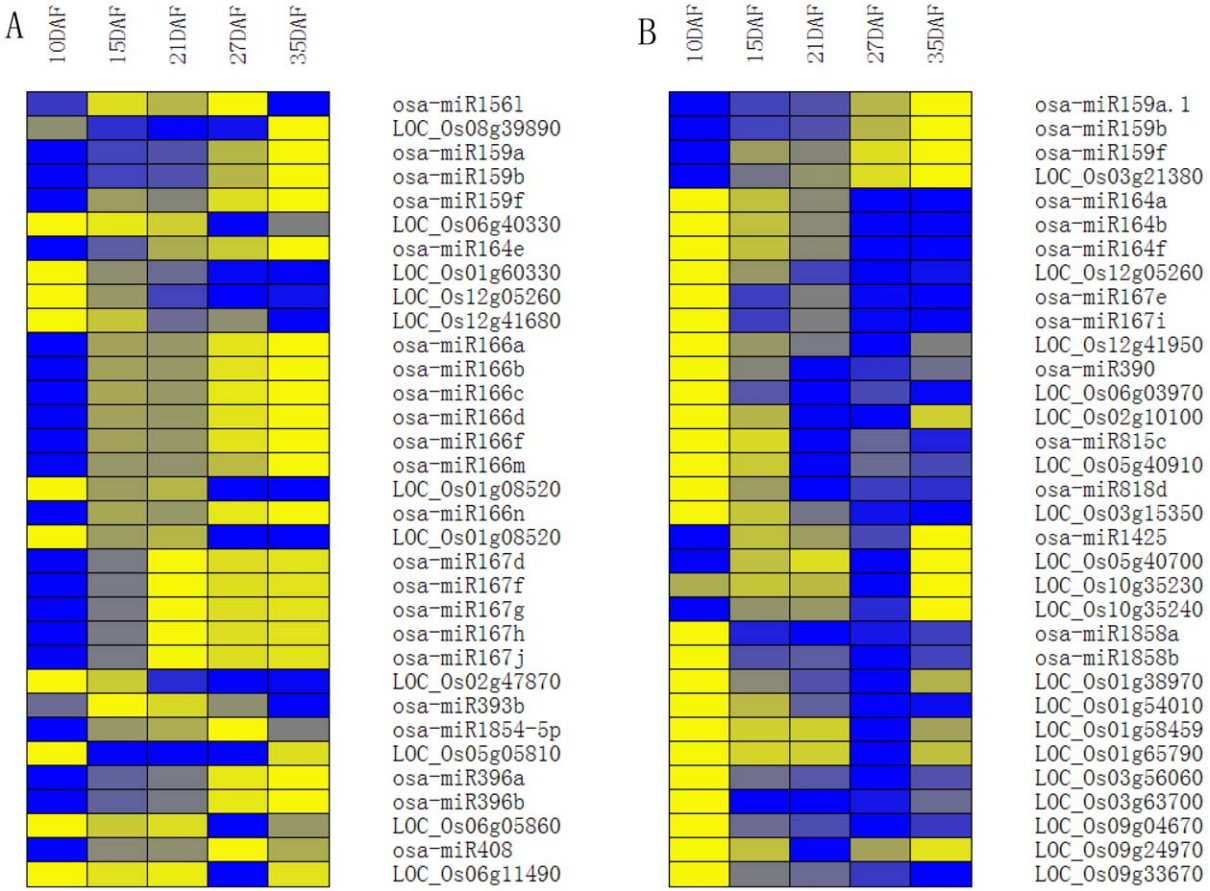

**Figure 6. Expression correlations of miRNAs and their corresponding targets during rice grain filling.** (A) The expression of miRNAs showed negative correlations with their corresponding targets during rice grain filling. (B) The expression of miRNAs showed positive correlations with their corresponding targets during rice grain filling. Yellow represents high expression and blue represents low expression. The heap map was performed on the log2-normalized expression. DAF represents days after flowering.  
 doi:10.1371/journal.pone.0054148.g006

Similar trends were observed in miR156, miR164, miR166, and miR1861 (Fig. 7B-E), but were not apparent for miR812 (Fig. 7F). Furthermore, during rice grain filling, the dynamic changes of endogenous IAA shows a negative correlation with the expression of miR167, but positive correlation with the grain filling rate [9]. Thus, the miR167-ARF8-OsGH3.2-IAA pathway, in conjunction with other microRNA-mediated auxin signals, such as miR164 [57], miR160 [58,59], and miR390 [55] results in a

suitable IAA level in developing rice grains for regulating the progress of rice grain filling (Fig. 8).

MiR159, miR319, miR812, and miR819 target gene transcripts coding MYB family transcription factor (MYB), TCP family transcription factor (TCP), 1-aminocyclopropane-1-carboxylate oxidase protein (ACC), and BRASSINOSTEROID INSENSITIVE 1-associated receptor kinase 1 precursor (BAK1), which are involved in the regulation of ABA, jasmonic acid, ethylene, and

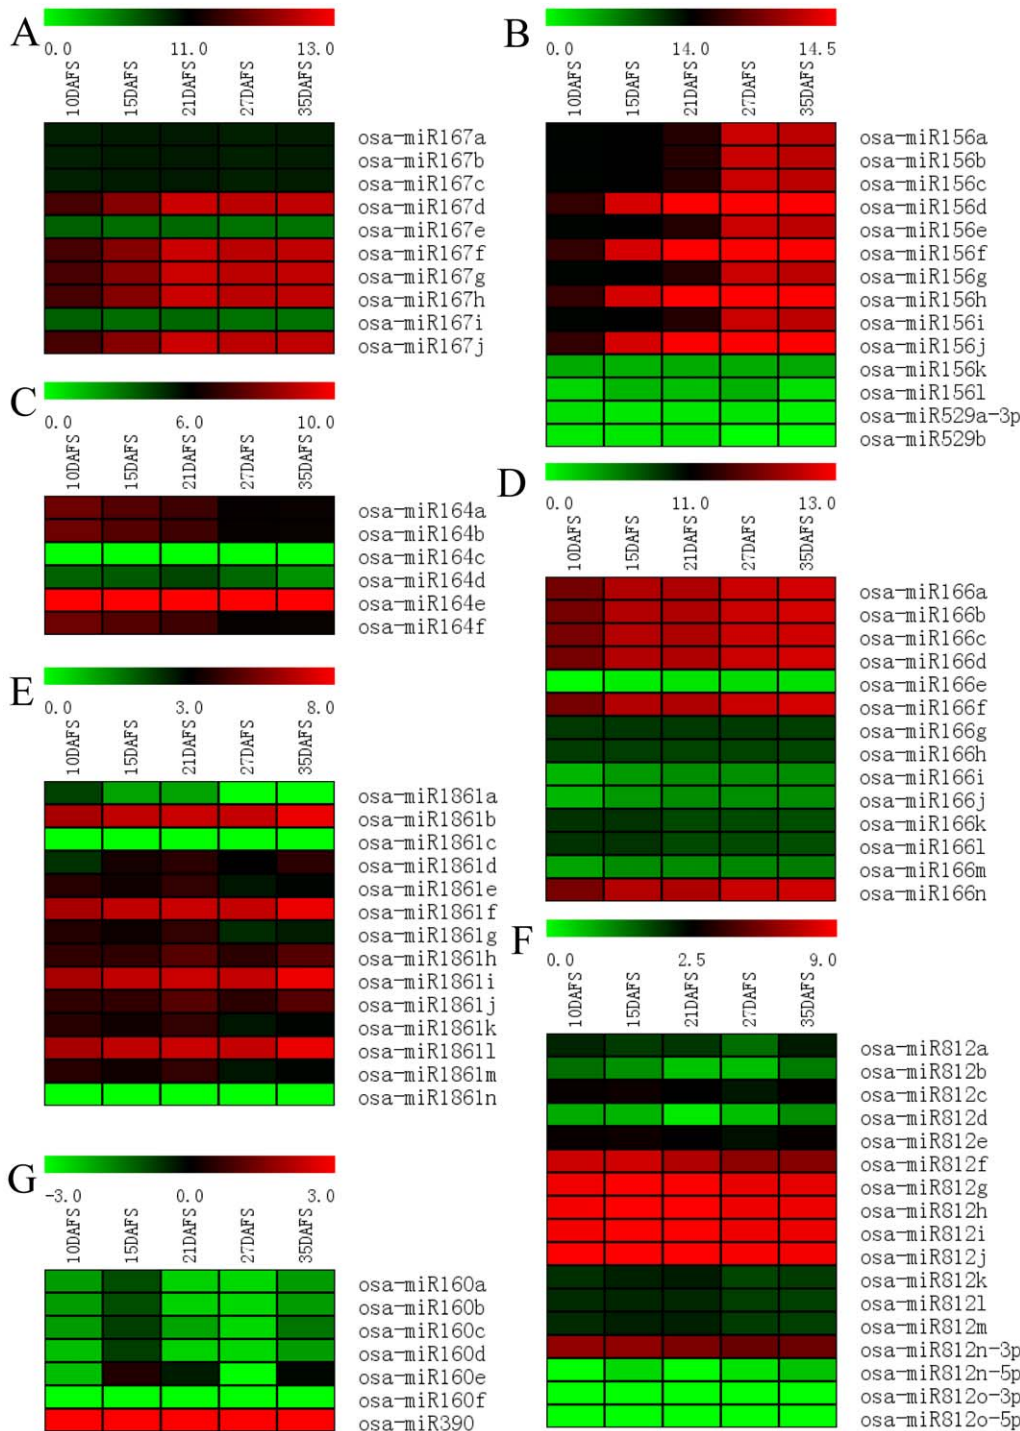

**Figure 7. Expression analysis of miRNAs involve in rice grain-filling.** Red represents high expression and green represents low expression. The heatmap was performed on the log<sub>2</sub>-normalized expression. DAF represents days after flowering. doi:10.1371/journal.pone.0054148.g007

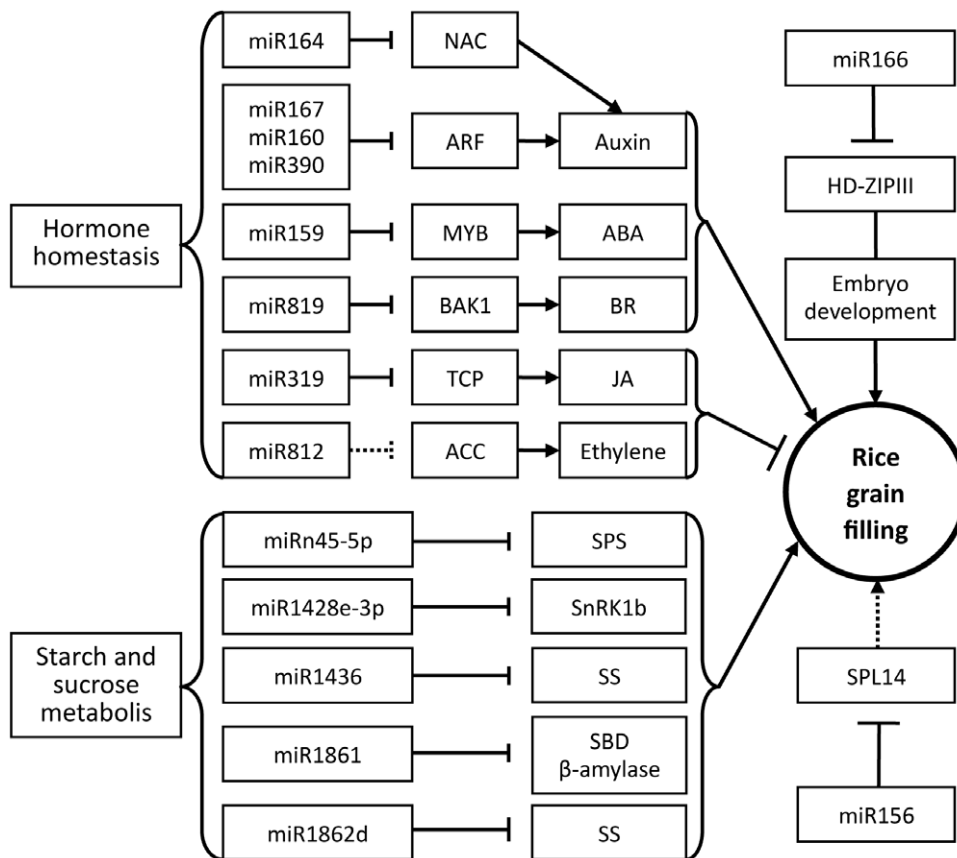

**Figure 8. A possible functional network of miRNAs involved in rice grain-filling.** The arrows indicate positive regulation, the nail shapes represent negative regulation, and straight lines indicate regulation. ARF: auxin response factor; MYB: MYB family transcription factor; TCP: TCP family transcription factor; ACC: 1-aminocyclopropane-1-carboxylate oxidase protein; BAK1: BRASSINOSTEROID INSENSITIVE 1-associated receptor kinase 1 precursor; JA: jasmonic acid; BR: brassinosteroid; SPS: sucrose-phosphate synthase; SBD: starch-binding domain containing protein; SnRK1: sucrose non-fermenting-1-related kinase 1; SS: starch synthase. doi:10.1371/journal.pone.0054148.g008

brassinosteroid homeostasis, respectively [21,54,60]. During rice grain filling, the content of ABA was positively correlated with cell division and grain filling rate, while ethylene showed a reversed trend [7,9]. Application of cobalt ion (inhibitor of ethylene synthesis) or ABA at an early grain filling stage significantly increased endosperm cell division rate and cell number, grain filling rate, and grain weight of inferior spikelets, while application of ethephon or fluridone (an inhibitor of carotenoid synthesis) had the opposite effect [7]. Furthermore, jasmonic acid and brassinosteroid were also reported to affect grain filling in rice (Fig. 8) [8,61]. In addition, miRNAs involved in zeatin biosynthesis have been identified by KEGG pathway analysis in this study and may play important roles in determining the cellular free cytokinin level (Table S7). Rates of endosperm cell division and grain filling were reported to have a positive correlation with zeatin (Z+ZR) contents in rice grain development; application of kinetin to spikelets increased the total cell numbers per endosperm, grain filling rate, and grain weight of inferior spikelets (Fig. 8) [9,62].

#### MiRNAs involved in regulating genes for starch synthesis during rice grain filling

Rice grain filling is a process of starch biosynthesis in the growing endosperm. It has been reported that a series of enzymes, such as SUS, AGPase, SS, and SBE, play key roles in the pathway of starch and sucrose metabolism and are significantly correlated

with rice grain filling rate [6,63]. Several miRNAs were found to have differential expression that may have an impact on their target genes participating in starch and sucrose metabolism in this study. For example, A novel miRNA, miRn45-5p, was validated to target a putative sucrose-phosphate synthase (SPS), a key enzyme in sucrose synthesis by degradome data in starBase (Table S9) [64]. Os01g63810, encoding a starch-binding domain containing protein (SBD), is targeted by a miR1861 family that was strongly accumulated during rice grain filling (Fig. 7E), while transcript-encoding  $\beta$ -amylase (Os10g32810), targeted by miR1861, has been validated by degradome data [65]. Two other miRNAs, namely miR1436 and miR1862d, both cleaving mRNAs encoding starch synthase (SS), have been identified by scanning degradome data and 5'-RACE [65]. MiR1428e-3p targets a sucrose non-fermenting-1-related kinase 1 (SnRK1b) gene, which has a regulating role in starch accumulation [20]. In addition, it has been reported that MYB and ACC, targeted by miR159 and miR819, regulates the phytohormone steady-state of ABA and ethylene in plants, respectively [21,54]. Moreover, ABA concentration in the grains was positively correlated with the activities of SUS, AGPase, SS, and SBE [6,53], while ethylene concentration was negatively related to the enzyme activities of SUS, AGPase, and SS [4,66]. This indicates these miRNAs might have an impact on regulating the process of starch biosynthesis during rice grain filling (Fig. 8).

### Other miRNAs involved in regulating rice grain filling

More recently, Jeong et al [42] reported that simultaneously and panicle-preferentially expressed miR529-5p and miR156a-j downregulated SPL14, which regulated the panicle development by repressing panicle branching and consequently influenced the yield of rice [67,68]. Although these miRNAs are important in panicle development, in our dataset, miR156a-j, instead of miR529-5p, was preferentially expressed during rice grain filling with a great abundance at middle and later stages of rice grain filling (Fig. 7B). Similarly, although ectopic expression of miR166 resulted in loss of HD-ZIPIII expression in the SAM region of the developing embryo [69] and was also found expressed in a development stage-dependent manner during rice grain filling (Fig. 7D). These together with the data of miRNA-regulated plant hormone homeostasis and starch biosynthesis suggest that two types of miRNAs are involved in coordinating the development of the panicle. MiR156 and miR166 play a role in overall spikelets development, while miR167, miR164, miR812, miR1861, miR1428 and miR45 play a specific role in the differentiation during rice grain filling (Fig. 8). In addition, four miRNA families (miR397, miR398, miR408, and miR528) may play a role in repressing their targets encoding copper-binding proteins and L-ascorbate oxidases in rice developing seeds as previously discussed for rice [25].

### Supporting Information

**Figure S1 Plotting of novel miRNAs and their corresponding miRNA\*s on the miRNA precursors.**  
(DOCX)

**Figure S2 Plotting of miRNA and miRNA\* sequences on the miRNA precursor loci.**  
(DOCX)

**Figure S3 Grain weight per kernel and grain filling rate during rice grain filling period.**  
(TIF)

**Table S1 The primers used in this study.**  
(DOCX)

### References

- Fitzgerald MA, McCouch SR, Hall RD (2009) Not just a grain of rice: the quest for quality. *Trends in Plant Science* 14: 133–139.
- Sakamoto T, Matsuoka M (2008) Identifying and exploiting grain yield genes in rice. *Current opinion in plant biology* 11: 209–214.
- Wang E, Wang J, Zhu X, Hao W, Wang L, et al. (2008) Control of rice grain-filling and yield by a gene with a potential signature of domestication. *Nat Genet* 40: 1370–1374.
- Zhu G, Ye N, Yang J, Peng X, Zhang J (2011) Regulation of expression of starch synthesis genes by ethylene and ABA in relation to the development of rice inferior and superior spikelets. *J Exp Bot* 62: 3907–3916.
- Li Y, Fan C, Xing Y, Jiang Y, Luo L, et al. (2011) Natural variation in GS5 plays an important role in regulating grain size and yield in rice. *Nature genetics* 43: 1266–1269.
- Zhang H, Li H, Yuan L, Wang Z, Yang J, et al. (2012) Post-anthesis alternate wetting and moderate soil drying enhances activities of key enzymes in sucrose-to-starch conversion in inferior spikelets of rice. *J Exp Bot* 63: 215–227.
- Yang J, Zhang J, Wang Z, Liu K, Wang P (2006) Post-anthesis development of inferior and superior spikelets in rice in relation to abscisic acid and ethylene. *J Exp Bot* 57: 149–160.
- Wu CY, Trieu A, Radhakrishnan P, Kwok SF, Harris S, et al. (2008) Brassinosteroids regulate grain filling in rice. *Plant Cell* 20: 2130–2145.
- Zhang H, Tan G, Yang L, Yang J, Zhang J, et al. (2009) Hormones in the grains and roots in relation to post-anthesis development of inferior and superior spikelets in japonica/indica hybrid rice. *Plant Physiol Biochem* 47: 195–204.
- Zhang H, Chen T, Wang Z, Yang J, Zhang J (2010) Involvement of cytokinins in the grain filling of rice under alternate wetting and drying irrigation. *J Exp Bot* 61: 3719–3733.
- Van Ex F, Jacob Y, Martienssen RA (2011) Multiple roles for small RNAs during plant reproduction. *Curr Opin Plant Biol* 14: 588–593.
- Chen X (2009) Small RNAs and their roles in plant development. *Annu Rev Cell Dev Biol* 25: 21–44.
- Lelandais-Briere C, Sorin C, Declerck M, Benslimane A, Crespi M, et al. (2010) Small RNA diversity in plants and its impact in development. *Curr Genomics* 11: 14–23.
- Chuck G, Candela H, Hake S (2009) Big impacts by small RNAs in plant development. *Curr Opin Plant Biol* 12: 81–86.
- Liu Q, Chen Y-Q (2009) Insights into the mechanism of plant development: Interactions of miRNAs pathway with phytohormone response. *Biochemical and Biophysical Research Communications* 384: 1–5.
- Meng Y, Chen D, Ma X, Mao C, Cao J, et al. (2010) Mechanisms of microRNA-mediated auxin signaling inferred from the rice mutant osaxr. *Plant Signal Behav* 5: 252–254.
- Martin RC, Liu PP, Goloviznina NA, Nonogaki H (2010) microRNA, seeds, and Darwin?: diverse function of miRNA in seed biology and plant responses to stress. *J Exp Bot* 61: 2229–2234.
- Sunkar R, Li YF, Jagadeeswaran G (2012) Functions of microRNAs in plant stress responses. *Trends Plant Sci* 17: 196–203.
- Chen CJ, Liu Q, Zhang YC, Qu LH, Chen YQ, et al. (2011) Genome-wide discovery and analysis of microRNAs and other small RNAs from rice embryogenic callus. *RNA Biol* 8: 538–547.
- Zhu QH, Spriggs A, Matthew L, Fan L, Kennedy G, et al. (2008) A diverse set of microRNAs and microRNA-like small RNAs in developing rice grains. *Genome Res* 18: 1456–1465.
- Li T, Li H, Zhang YX, Liu JY (2011) Identification and analysis of seven H<sub>2</sub>O<sub>2</sub>-responsive miRNAs and 32 new miRNAs in the seedlings of rice (*Oryza sativa* L. ssp. indica). *Nucleic Acids Res* 39: 2821–2833.
- Hsieh LC, Lin SI, Shih ACC, Chen JW, Lin WY, et al. (2009) Uncovering small RNA-mediated responses to phosphate deficiency in Arabidopsis by deep sequencing. *Plant Physiol* 151: 2120–2132.
- Zhao YT, Wang M, Fu SX, Yang WC, Qi CK, et al. (2012) Small RNA Profiling in Two Brassica napus Cultivars Identifies MicroRNAs with Oil Production-and Development-Related Expression and New Small RNA Classes. *Plant Physiology* 158: 813–823.

**Table S2 Predicted target fragments of miRNA\*s from degradome data in starBase.**

(DOCX)

**Table S3 Abundance (in TPM) of known miRNAs in each library.**

(XLSX)

**Table S4 known miRNAs greater than 10 TPM in at least one of our libraries.**

(XLSX)

**Table S5 Cluster of the known miRNAs (higher than 10 TPM) during rice grain filling.**

(XLSX)

**Table S6 Predicted targets of highly expressed known miRNAs.**

(XLSX)

**Table S7 KEGG pathway analyses of predicted miRNA targets.**

(XLSX)

**Table S8 Predicted targets of novel miRNAs.**

(XLSX)

**Table S9 Predicted target fragments of novel miRNAs from starBase.**

(DOCX)

**Table S10 Expression of miRNAs and their corresponding target genes during rice grain filling.**

(XLSX)

### Author Contributions

Conceived and designed the experiments: TP HZS YXD JZ JZL QZZ. Performed the experiments: TP HZS YXL YFZ. Analyzed the data: TP HZS QZZ. Contributed reagents/materials/analysis tools: TP HZS QZZ. Wrote the paper: TP HZS QZZ.



24. Lan Y, Su N, Shen Y, Zhang R, Wu F, et al. (2012) Identification of novel MiRNAs and MiRNA expression profiling during grain development in indica rice. *BMC Genomics* 13: 264.
25. Xue LJ, Zhang JJ, Xue HW (2009) Characterization and expression profiles of miRNAs in rice seeds. *Nucleic Acids Res* 37: 916–930.
26. Xu SB, Li T, Deng ZY, Chong K, Xue Y, et al. (2008) Dynamic proteomic analysis reveals a switch between central carbon metabolism and alcoholic fermentation in rice filling grains. *Plant Physiol* 148: 908–925.
27. Tsutomu, Toshiaki (2003) Morphological development of rice caryopses located at the different positions in a panicle from early to middle stage of grain filling. *Functional Plant Biology* 30: 1139–1149.
28. Li R, Li Y, Kristiansen K, Wang J (2008) SOAP: short oligonucleotide alignment program. *Bioinformatics* 24: 713–714.
29. Gardner PP, Daub J, Tate JG, Nawrocki EP, Kolbe DL, et al. (2009) Rfam: updates to the RNA families database. *Nucleic Acids Res* 37: D136–D140.
30. Peng T, Lv Q, Zhang J, Li J, Du Y, et al. (2011) Differential expression of the microRNAs in superior and inferior spikelets in rice (*Oryza sativa*). *J Exp Bot* 62: 4943–4954.
31. Allen E, Xie Z, Gustafson AM, Carrington JC (2005) microRNA-directed phasing during trans-acting siRNA biogenesis in plants. *Cell* 121: 207–221.
32. Schwab R, Palatnik JF, Riester M, Schommer C, Schmid M, et al. (2005) Specific effects of microRNAs on the plant transcriptome. *Developmental cell* 8: 517–527.
33. Song X, Li P, Zhai J, Zhou M, Ma L, et al. (2012) Roles of DCL4 and DCL3b in rice phased small RNA biogenesis. *Plant J* 69: 462–474.
34. Meyers BC, Axtell MJ, Bartel B, Bartel DP, Baulcombe D, et al. (2008) Criteria for annotation of plant microRNAs. *Plant Cell* 20: 3186–3190.
35. Wei LQ, Yan LF, Wang T (2011) Deep sequencing on genome-wide scale reveals the unique composition and expression patterns of microRNAs in developing pollen of *Oryza sativa*. *Genome Biol* 12: R53.
36. Voinnet O (2009) Origin, biogenesis, and activity of plant microRNAs. *Cell* 136: 669–687.
37. Li YF, Zheng Y, Addo-Quaye C, Zhang L, Saini A, et al. (2010) Transcriptome-wide identification of microRNA targets in rice. *Plant J* 62: 742–759.
38. Wu L, Zhang Q, Zhou H, Ni F, Wu X, et al. (2009) Rice MicroRNA effector complexes and targets. *Plant Cell* 21: 3421–3435.
39. Zhou M, Gu L, Li P, Song X, Wei L, et al. (2010) Degradome sequencing reveals endogenous small RNA targets in rice (*Oryza sativa* L. ssp. *indica*). *Frontiers in Biology* 5: 67–90.
40. Yang JH, Li JH, Shao P, Zhou H, Chen YQ, et al. (2011) starBase: a database for exploring microRNA-mRNA interaction maps from Argonaute CLIP-Seq and Degradome-Seq data. *Nucleic Acids Res* 39: D202–209.
41. Devers EA, Branscheid A, May P, Krajinski F (2011) Stars and symbiosis: microRNA-and microRNA\*-mediated transcript cleavage involved in arbuscular mycorrhizal symbiosis. *Plant Physiol* 156: 1990–2010.
42. Jeong DH, Park S, Zhai J, Gurazada SG, De Paoli E, et al. (2011) Massive analysis of rice small RNAs: mechanistic implications of regulated microRNAs and variants for differential target RNA cleavage. *Plant Cell* 23: 4185–4207.
43. Nikovics K, Blein T, Peaucelle A, Ishida T, Morin H, et al. (2006) The balance between the MIR164A and CUC2 genes controls leaf margin serration in Arabidopsis. *The Plant Cell Online* 18: 2929–2945.
44. Ru P, Xu L, Ma H, Huang H (2006) Plant fertility defects induced by the enhanced expression of microRNA167. *Cell Research* 16: 457–465.
45. Zhao YT, Wang M, Fu SX, Yang WC, Qi CK, et al. (2012) Small RNA Profiling in Two Brassica napus Cultivars Identifies MicroRNAs with Oil Production-and Development-Related Expression and New Small RNA Classes. *Plant Physiol* 158: 813–823.
46. Meng Y, Shao C, Gou L, Jin Y, Chen M (2011) Construction of MicroRNA-and MicroRNA\*-mediated regulatory networks in plants. *RNA biology* 8.
47. Zhang X, Zhao H, Gao S, Wang WC, Katiyar-Agarwal S, et al. (2011) Arabidopsis Argonaute 2 Regulates Innate Immunity via miRNA393\*-Mediated Silencing of a Golgi-Localized SNARE Gene, MEMB12. *Molecular cell* 42: 356–366.
48. Cao S, Kumimoto RW, Siriwardana CL, Risinger JR, Holt BF (2011) Identification and characterization of NF-Y transcription factor families in the monocot model plant *Brachypodium distachyon*. *PLoS One* 6: e21805.
49. Meng Y, Gou L, Chen D, Wu P, Chen M (2010) High-throughput degradome sequencing can be used to gain insights into microRNA precursor metabolism. *J Exp Bot* 61: 3833–3837.
50. Okamura K, Phillips MD, Tyler DM, Duan H, Chou Y, et al. (2008) The regulatory activity of microRNA\* species has substantial influence on microRNA and 3' UTR evolution. *Nature structural & molecular biology* 15: 354–363.
51. Kuchenbauer F, Mah SM, Heuser M, McPherson A, Rüschemann J, et al. (2011) Comprehensive analysis of mammalian miRNA\* species and their role in myeloid cells. *Blood* 118: 3350–3358.
52. Santner A, Estelle M (2009) Recent advances and emerging trends in plant hormone signalling. *Nature* 459: 1071–1078.
53. Tang T, Xie H, Wang Y, Lu B, Liang J (2009) The effect of sucrose and abscisic acid interaction on sucrose synthase and its relationship to grain filling of rice (*Oryza sativa* L.). *J Exp Bot* 60: 2641–2652.
54. Reyes JL, Chua NH (2007) ABA induction of miR159 controls transcript levels of two MYB factors during Arabidopsis seed germination. *The Plant Journal* 49: 592–606.
55. Marin E, Jouanet V, Herz A, Lokerse AS, Weijers D, et al. (2010) miR390, Arabidopsis TAS3 tasiRNAs, and their AUXIN RESPONSE FACTOR targets define an autoregulatory network quantitatively regulating lateral root growth. *The Plant Cell Online* 22: 1104.
56. Yang JH, Han SJ, Yoon EK, Lee WS (2006) Evidence of an auxin signal pathway, microRNA167-ARF8-GH3, and its response to exogenous auxin in cultured rice cells. *Nucleic acids research* 34: 1892.
57. Guo HS, Xie Q, Fei JF, Chua NH (2005) MicroRNA directs mRNA cleavage of the transcription factor NAC1 to downregulate auxin signals for Arabidopsis lateral root development. *Plant Cell* 17: 1376–1386.
58. Liu PP, Montgomery TA, Fahlgren N, Kasschau KD, Nonogaki H, et al. (2007) Repression of AUXIN RESPONSE FACTOR10 by microRNA160 is critical for seed germination and post-germination stages. *The Plant Journal* 52: 133–146.
59. Mallory AC, Bartel DP, Bartel B (2005) MicroRNA-directed regulation of Arabidopsis AUXIN RESPONSE FACTOR17 is essential for proper development and modulates expression of early auxin response genes. *The Plant Cell Online* 17: 1360.
60. Schommer C, Palatnik JF, Aggarwal P, Chetelat A, Cubas P, et al. (2008) Control of jasmonate biosynthesis and senescence by miR319 targets. *PLoS Biol* 6: e230.
61. Kim EH, Kim YS, Park SH, Koo YJ, Choi YD, et al. (2009) Methyl jasmonate reduces grain yield by mediating stress signals to alter spikelet development in rice. *Plant Physiol* 149: 1751–1760.
62. Yang J, Zhang J, Huang Z, Wang Z, Zhu Q, et al. (2002) Correlation of cytokinin levels in the endosperms and roots with cell number and cell division activity during endosperm development in rice. *Ann Bot* 90: 369–377.
63. Yang J, Zhang J (2010) Grain-filling problem in 'super' rice. *J Exp Bot* 61: 1–5.
64. Lunn JE, MacRae E (2003) New complexities in the synthesis of sucrose. *Current opinion in plant biology* 6: 208–214.
65. Zheng Y, Li YF, Sunkar R, Zhang W (2012) SeqTar: an effective method for identifying microRNA guided cleavage sites from degradome of polyadenylated transcripts in plants. *Nucleic Acids Res* 40: e28.
66. Mohapatra PK, Sarkar RK, Kuanar SR (2009) Starch synthesizing enzymes and sink strength of grains of contrasting rice cultivars. *Plant Science* 176: 256–263.
67. Jiao Y, Wang Y, Xue D, Wang J, Yan M, et al. (2010) Regulation of OsSPL14 by OsmiR156 defines ideal plant architecture in rice. *Nat Genet* 42: 541–544.
68. Miura K, Ikeda M, Matsubara A, Song XJ, Ito M, et al. (2010) OsSPL14 promotes panicle branching and higher grain productivity in rice. *Nat Genet* 42: 545–549.
69. Nagasaki H, Itoh J, Hayashi K, Hibara K, Satoh-Nagasawa N, et al. (2007) The small interfering RNA production pathway is required for shoot meristem initiation in rice. *Proceedings of the National Academy of Sciences* 104: 14867.
